1 **Pervasive impacts of climate change on the woodiness and ecological generalism of dry**  
2 **forest plant assemblages**

3  
4 **SRT:** Climate change-driven biotic changes in tropical dry forests

5  
6 **Authors:** Mario R. Moura<sup>1,\*</sup> Felipe A. O. do Nascimento<sup>2</sup>, Lucas N. Paolucci<sup>3</sup>, Daniel P. Silva<sup>4</sup>,  
7 Bráulio A. Santos<sup>1,5</sup>

8  
9 <sup>1</sup> Departamento de Ciências Biológicas, Universidade Federal da Paraíba, Areia, Brazil

10 <sup>2</sup> Programa de Pós-Graduação em Biologia Vegetal, Universidade Federal de Pernambuco,  
11 Recife, Brazil

12 <sup>3</sup> Departamento de Biologia Geral, Universidade Federal de Viçosa, Viçosa, Brazil

13 <sup>4</sup> COBIMA Lab, Departamento de Ciências Biológicas, Instituto Federal Goiano, Urutaí, Brazil

14 <sup>5</sup> Departamento de Ecologia e Sistemática, Universidade Federal da Paraíba, João Pessoa, Brazil

15 \*Corresponding author: [mariormoura@gmail.com](mailto:mariormoura@gmail.com)

16  
17 **Abstract:** Climate emergency is a significant threat to biodiversity in the 21<sup>st</sup> century, but  
18 species will not be equally affected. In summing up different species' responses at the local  
19 scale, we can assess changes in the species quantity and composition of biotic assemblages.  
20 Here we investigated climate change driven variation in species richness and spatial beta-  
21 diversity using modelled distributions of 2,841 plant species in Caatinga, the largest dry  
22 forest region of South America. More than 99% of plant assemblages were projected to  
23 lose species by 2060, with biotic homogenisation — the decrease in spatial beta-diversity —

24 **forecasted in 40% of the Caatinga. Replacement of narrow-range woody species by wide-**  
25 **range non-woody ones should impact at least 85% of Caatinga plant assemblages. The**  
26 **future increase in aridity will change patterns of woodiness and ecological generalism of**  
27 **tropical dry forest plant assemblages, and ultimately erode ecosystem services linked to**  
28 **biomass productivity and carbon storage.**

29

30 Climate change has been altered the environmental conditions experienced by many  
31 species on Earth <sup>1</sup>. If species tolerances do not encompass the novel climatic conditions, they  
32 may be forced to change their phenology or geographic range to track suitable climates <sup>2,3</sup>.  
33 Spatial changes in the geographic range of species can alter the composition of species  
34 assemblages <sup>4</sup>. While certain species can colonise new sites in the future, most may not disperse  
35 quickly enough to avoid local extinctions, with the extinction risk being greatest for species with  
36 low vagility and narrow distribution <sup>5</sup>. High local extinctions of narrow-range species and the  
37 potential colonisation of new sites by wide-range species can lead to the biotic homogenisation  
38 of species assemblages <sup>6</sup>, and the eventual loss of ecosystem functions provided by such species  
39 <sup>7</sup>. Because the climate emergency is a higher threat for tropical species <sup>2,5</sup>, long-term  
40 conservation planning will benefit from understanding how different tropical ecosystems are  
41 subject to biotic changes <sup>8,9</sup>.

42 Climate change has induced the biotic homogenisation of plant assemblages in several  
43 ecosystems around the world <sup>10</sup>, including drylands <sup>8,11,12</sup>. It has been suggested that dryland  
44 plants already experience a high water deficit and are close to their climatic tolerances <sup>9</sup>. One of  
45 the world's largest and floristically richest tropical dry forest is found in northeastern Brazil —  
46 the Caatinga — with 912,529 km<sup>2</sup> <sup>13,14</sup>. Future climate projections indicate increases in aridity,

47 with subsequent desertification of some areas within the Caatinga<sup>15</sup>. Previous research has  
48 shown that climate change should drive range contraction of endemic Caatinga plant species,  
49 especially those with more specialised life history attributes<sup>16</sup>. Indeed, the colonisation and  
50 extinction rates of species assemblages may be affected by species geography and life-history  
51 attributes<sup>17</sup>. Narrow-range species tend to be more sensitive to climate change, whereas wide-  
52 range species often exhibit broader climatic niches and thus high ecological generalism<sup>18</sup>.  
53 Among flowering plants, the growth form is known to reflect species ecophysiology<sup>19</sup>, with  
54 woody plant species likely exhibiting limited adaptability to climate change due to their longer  
55 generation time and slower rates of climatic niche evolution relative to non-woody plants<sup>20</sup>.

56 We applied ecological niche models (ENMs) under an ensemble modelling framework to  
57 estimate the current and future geographic distribution patterns of 2,841 Caatinga plant species,  
58 and then assessed potential biotic changes in local plant assemblage richness ( $\Delta S = S_{\text{future}} -$   
59  $S_{\text{current}}$ ) and spatial beta-diversity ( $\Delta\beta_{\text{SOR}} = \beta_{\text{SOR, future}} - \beta_{\text{SOR, current}}$ ) in response to climate change  
60 (see Methods). Our investigation considered the latest projections on future climate scenarios<sup>21</sup>  
61 for 2060 and 2100, under the business-as-usual (SSP245) and non-mitigation (SSP585)  
62 scenarios. Ensemble models showed good predictive performance, with an average Sørensen  
63 similarity index of 0.934 (SD = 0.043, range = 0.703–1.00; Fig. S2). Because our results were  
64 qualitatively similar for 2060 and 2100, we focused on 2060 projections for brevity (see  
65 Extended Data for results concerning the year 2100).

66

## 67 **RESULTS**

68 Climate change will drastically alter plant biodiversity in one of the world's largest  
69 seasonal tropical dry forests, the Caatinga. Our projections show that almost 90% of Caatinga

70 plant species will lose suitable areas by 2060, particularly narrow-range species (Fig 1). The  
71 current distribution of Caatinga plant species will decrease on average by 37.4% and 43.9% in  
72 the SSP245 and SSP585 scenarios, respectively. No Caatinga plant species is projected to lose its  
73 entire suitable area within the Neotropics, but in the Caatinga, from 62 (SSP245) to 89 (SSP585)  
74 species could be regionally extinct —100% of range loss— by 2060, and between 141 (SSP245)  
75 and 349 (SSP585) species could be regionally extinct by 2100.

76 At the assemblage-level, more than 99% of plant assemblages in the Caatinga will lose  
77 species by 2060 (Fig. 2b and c). Biotic homogenisation ( $\Delta\beta_{\text{SOR}} < 0$ ) is expected in about 40% of  
78 Caatinga plant assemblages, particularly in species-poor regions currently dominated by non-  
79 woody and wide-range species (Fig. 2e and f). Relative to regions subject to biotic  
80 heterogenisation, the future homogenised plant assemblages currently harbour lower species  
81 richness ( $\chi^2 = 3834.9$ ,  $df = 7$ ,  $p < 0.001$ , Fig. 3a), lower proportion of woody species ( $\chi^2 =$   
82  $1008.6$ ,  $df = 7$ ,  $p < 0.001$ , Fig. 3b), and higher proportion of wide-range species ( $\chi^2 = 1953.1$ ,  $df$   
83  $= 7$ ,  $p < 0.001$ , Fig. 3c). Although we projected a pervasive decrease in woodiness and an  
84 increase in the ecological generalism of plant assemblages, the magnitude of such changes  
85 differs between future homogenised or heterogenised regions. Plant assemblages facing  
86 homogenisation risk by 2060 showed lower species loss ( $\chi^2 = 4478.8$ ,  $df = 7$ ,  $p < 0.001$ , Fig. 3d),  
87 higher decrease in relative contribution of woody species ( $\chi^2 = 1419.3$ ,  $df = 7$ ,  $p < 0.001$ , Fig.  
88 3e), and lower increase in relative contribution of wide-range species ( $\chi^2 = 1662.6$ ,  $df = 7$ ,  $p <$   
89  $0.001$ , Fig. 3f) than assemblages subject to heterogenisation.

90 We observed a predominance of assemblages with a higher proportion of non-woody and  
91 wide-range species in the northern and middle-west regions of the Caatinga, whereas  
92 assemblages with relatively more woody and narrow-range species occurred in the southern and

93 northeastern Caatinga (Fig. 4). Under the business-as-usual scenario, 98.4% of plant assemblages  
94 will experience a reduction in the proportion of woody species ( $WoodyRatio < 1$ ), slightly less  
95 than in the non-mitigation scenario (98.9% of assemblages). The relative contribution of wide-  
96 range species will increase ( $WideRatio > 1$ ) in most assemblages in both SSP scenarios (86.1%  
97 in the SSP245 and 85.3% in the SSP585, Fig. 4b and c). In all SSP scenarios investigated, the  
98 increase in spatial beta-diversity of plant assemblages was directly related to species loss (Fig. 5a  
99 and b), with changes in relative contribution of wide-range species linked to the decrease in  
100 proportion of woody species (Fig. 5c and d).

101

## 102 **DISCUSSION**

103         The exacerbated decrease in plant richness can erode ecosystem services in Caatinga by  
104 2060. In drylands worldwide, the role of plant richness in productivity stability is as important as  
105 that of climate and edaphic conditions<sup>22</sup>. Under high aridity, species-rich assemblages are more  
106 critical for ecosystem stability, whereas functionally distinct species minimise variation in the  
107 temporal delivery of ecosystem services at low aridity<sup>22</sup>. Climate change is expected to increase  
108 aridity in Caatinga, particularly in the central-southern region<sup>15</sup>, where our projections indicate a  
109 higher species loss of plant assemblages. To worsen the situation, 98.4–98.9% of Caatinga plant  
110 assemblages will lose relatively more woody than non-woody species, which should enhance the  
111 impacts on biomass productivity and carbon storage in drylands<sup>23,24</sup>.

112         Aridity may favour the establishment of wide-range plant species<sup>25</sup>. Since most wide-  
113 range plant species in Caatinga have non-woody growth-forms<sup>26</sup>, the projected increase in  
114 aridity in this region will lead to structural changes in vegetation complexity. With higher aridity,  
115 dryland ecosystems face a vegetation decline phase due to the reduction of leaf area and canopy

116 cover<sup>27</sup>. Aridification can also promote compositional change<sup>28</sup> and reduce the beta-diversity of  
117 dryland plant assemblages<sup>29</sup>. As environmental filtering can better explain the beta-diversity of  
118 herbs and shrubs than that of trees<sup>30,31</sup>, woody species' distributions are likely at a lower  
119 equilibrium with climate than those of non-woody species, implying that woody species may not  
120 keep pace with climate change. Projected changes in the species richness and beta-diversity of  
121 Caatinga plant assemblages can therefore underestimate the impacts of climate change on plant  
122 assemblages with higher levels of woodiness.

123         The impacts of climate change are often expected to be less severe in mountainous  
124 regions<sup>32</sup>. Although elevational gradients can allow species to track more suitable climates over  
125 time, the spatial configuration of mountainous areas can limit elevational range shifts<sup>33</sup>,  
126 particularly for woody species<sup>34</sup>. In the Caatinga, the four most relevant highlands — where  
127 many narrow-range woody species concentrates — are disconnected from each other and located  
128 in transitional zones in the south (*Chapada Diamantina*), east (*Planalto da Borborema*) and  
129 central-northwest (*Chapada do Araripe* and *Serra da Ibiapaba*), which impose additional  
130 dispersal constraints on woody species there. Threats to woody species and their ecosystem  
131 functions could be considerably greater than those we project. Vertebrates and invertebrates  
132 interacting with woody plants — herbivores, seed dispersers, and pollinators — will have to  
133 couple with the sudden changes in availability and composition of plant resources<sup>35,36</sup>,  
134 ultimately scaling up the potential for disruption of biotic interactions<sup>37</sup>.

135         We have shown how climate change can jeopardise Caatinga plant biodiversity, but much  
136 of this region is also affected by chronic disturbances<sup>38</sup> that can operate synergistically with  
137 climate change, and intensify the impacts of biodiversity loss on ecosystem functions<sup>39</sup>.  
138 Caatinga already lost half its original cover, and more than 90% of the remaining fragments have

139 less than 500 ha.<sup>38</sup> For some non-woody, self-pollinated, and wind-dispersed species, this  
140 scenario may not prevent range expansion, but our projections show an extensive reduction in  
141 suitable areas for most woody and non-woody species. Interestingly, the western half of the  
142 Caatinga, where biotic changes are most pronounced, also concentrates the most conserved dry  
143 forest remnants<sup>38</sup>. This coincident spatial configuration imposes both a challenge and an  
144 opportunity to expand the protected area network to assure the connectivity and long-term  
145 persistence of Caatinga plant assemblages. Caatinga still figures with around 1% of the original  
146 extension covered by strictly protected areas<sup>40</sup>, far beyond the more recent thresholds  
147 established under the post-2020 Global Biodiversity Frame of conserving 30% of Earth's land by  
148 2030<sup>41</sup>. As a member of the Convention on Biological Diversity and the sole holder of the  
149 Caatinga, Brazil will have a crucial role in conserving the most extensive tropical dry forest in  
150 South America.

151

## 152 **METHODS**

### 153 **Species data**

154 We compiled occurrence records of Caatinga flowering plants from the scientific literature and  
155 herbarium records, available at the Global Biodiversity Information Facility<sup>42</sup> and speciesLink  
156 ([splink.cria.org.br](http://splink.cria.org.br)). We restricted the spatial coverage of the species occurrence dataset to the  
157 Neotropical region and recorded a total of 4,890,681 occurrences for 8,629 species. Records that  
158 were duplicated, with georeferencing errors or uncertain identification were excluded. To reduce  
159 the potential effect of sampling bias and spatial autocorrelation in the occurrence dataset, we  
160 randomly filtered one occurrence record for each species within a radius of ~10 km<sup>43</sup> leading to  
161 1,024,363 occurrences of 7,936 species. Preliminary inspections indicated that many species

162 occurred marginally in the Caatinga. Because our focus was on typical Caatinga plants, we kept  
163 only those species with at least 10% of their occurrences within the Caatinga, resulting in  
164 345,848 occurrences of 4,534 species. We excluded species with fewer than 15 occurrence  
165 records<sup>44</sup> and kept for subsequent modelling procedures 335,091 records of 2,841 species  
166 belonging to 776 genera and 141 botanical families (Fig. S1).

167 We gathered data on the growth-form of Caatinga flowering species using the Botanical  
168 Information and Ecology Network<sup>45</sup>, the Plant Trait Database<sup>46</sup>, and the Brazilian Flora 2020<sup>47</sup>,  
169 complemented by pertinent literature<sup>26,48,49</sup>. For each species, we assigned one out of seven  
170 growth form types: tree, shrub, palm tree, woody vine, herb, herbaceous vine, or succulent. For  
171 species with multiple growth-form categories we assigned the growth form agreed upon by most  
172 sources<sup>50</sup>. We then grouped the species into two categories: (i) woody (trees, shrubs, palms, and  
173 woody vines) and (ii) non-woody species (herbs, herbaceous vines, and succulents). Growth-  
174 form was assigned to 2,476 angiosperm species (1,341 woody and 1,135 non-woody species,  
175 Table S1), covering 87.2% of species in our database.

176

### 177 **Current and future climate projections**

178 We used the 19 bioclimatic variables from the WorldClim database, version 2.1<sup>51</sup> to represent  
179 the current climate. Bioclimatic layers were downloaded at 5 arc-min (~10 km) and cropped to  
180 the extent of the Neotropical realm (our background). To avoid problems with multicollinearity  
181 and reduce the dimensionality of predictor layers, we performed a principal component analysis  
182 (PCA) and retained the first six axes representing the principal components as climate predictors.  
183 PCA axes explained 96.8% of the variation in the original data. We used PCA loading



184 coefficients to project the linear relationship between raw predictors and principal components  
185 onto new layers representing future climate scenarios.

186 We considered future climate projections for the periods 2041–2060 (hereafter 2060) and  
187 2081–2100 (hereafter 2100) following the 6th Assessment Report of the Intergovernmental Panel  
188 on Climate Change <sup>21</sup>. We used two Shared Socioeconomic Pathways (SSP) for each period:  
189 SSP245 and SSP585 as a business-as-usual and non-mitigation scenario, respectively. Because  
190 the selection of different generalised circulation models (GCM) is recognised as a source of  
191 uncertainty in projecting the future habitat suitability of species <sup>52</sup>, we used five GCMs for each  
192 combination of the period and SSP, namely: BCC-CSM2-MR, CNRM-CM6-1, IPSL-CM6A-LR,  
193 MIROC6, and MRI-ESM2-0.

194

### 195 **Ecological niche models**

196 For each species, we computed pseudoabsences using the same number of observed presences to  
197 maintain the presence-absence ratio of 1:1 <sup>53</sup>. Pseudoabsences were allocated following the  
198 environmentally constrained method, based on the lowest suitable region predicted by a climate  
199 envelope <sup>54</sup>. The choice of the statistical method or algorithm can affect the resulting predictions  
200 from an ecological niche model (ENM) depending on the initial modelling conditions <sup>55</sup>. We  
201 computed an ensemble of projections for each species to minimise uncertainty around the ENM  
202 method <sup>56</sup>. The ensemble included projections with six methods: Climate envelope (BIOCLIM),  
203 Gower Environmental Distance (DOMAIN), Generalised Linear Models, Generalised Additive  
204 Models, Maximum Entropy, and Random Forests. We used the species accessible area to mask  
205 its respective projections to avoid predicting habitat suitability for regions unreachable by a  
206 species within the time frame of projected climate change. The accessible area for each species

207 was defined by a buffer with a width size equal to the maximum nearest neighbour distance  
208 among pairs of occurrences<sup>57</sup>. Models were calibrated for the baseline period using 4-fold cross-  
209 validation, 75% of randomly selected samples used for model training and the remaining 25%  
210 used for testing in each iteration.

211 To evaluate model performance, we measured the similarity between predictions and  
212 observations using the Sørensen similarity index, which is independent of species prevalence<sup>58</sup>.  
213 It is necessary to binarise the species habitat suitability according to some threshold value to  
214 compute the Sørensen index. We used the species suitability value that maximised the Sørensen  
215 index for each algorithm at the baseline period. The ensemble model for each species was  
216 computed as the average weighted suitability, with weights given by the Sørensen index  
217 calculated for each algorithm. We used the average binarisation threshold weighted by the  
218 Sørensen index to binarise the ensemble habitat suitability into presence-absence maps for each  
219 species in current time and future scenarios.

220 We applied an occurrence-based restriction to keep only the patches of suitable habitat  
221 considered reachable by a species<sup>59</sup> to minimise overprediction issues associated with presence-  
222 absence maps derived from ENMs. Patches of suitable habitats are assumed to be reachable by  
223 the species if they overlap with a presence record or are within an edge-edge distance threshold  
224 of an occupied suitable patch<sup>59</sup>. This distance threshold was defined as the maximum nearest  
225 neighbour distance among pairs of occurrences of the respective species. Computations were  
226 performed in R 4.1.0<sup>60</sup> using the package *ENMTML*<sup>61</sup>.

227

228 **Spatial patterns of beta-diversity, woodiness, and ecological generalism**

229 We mapped the Caatinga using an equal-area projection grid cell of 10×10 km of spatial  
230 resolution to assess changes in beta-diversity spatial pattern. Using the binary maps for the  
231 ensemble projection, we built species presence-absence matrices for projections based on the  
232 current time and for each combination of the future period (2060 and 2100) and the SSP scenario  
233 (SSP245 and SSP585). We only considered species presence in a grid cell if they occupied at  
234 least 50% of the cell area. The spatial beta-diversity for each grid cell was measured by the  
235 Sørensen-based multiple-site dissimilarity index,  $\beta_{\text{SOR}}$ <sup>62</sup>, computed for the cell set formed by the  
236 focal cell and its immediately adjacent neighbour cells. Because the size of the cell set can affect  
237 the  $\beta_{\text{SOR}}$  value<sup>63</sup>, we applied a subsampling procedure to randomly select four neighbour cells  
238 around each focal cell 100 times to compute the average  $\beta_{\text{SOR}}$  across iterations. We used the  $\beta_{\text{SOR}}$   
239 difference between each future and current scenario ( $\Delta\beta_{\text{SOR}} = \beta_{\text{SOR.future}} - \beta_{\text{SOR.current}}$ ) to identify  
240 plant assemblages (cells) subject to biotic homogenisation ( $\Delta\beta_{\text{SOR}} < 0$ ) or heterogenisation  
241 ( $\Delta\beta_{\text{SOR}} > 0$ ). We also calculated the difference between future and current species richness ( $\Delta S =$   
242  $S_{\text{future}} - S_{\text{current}}$ ). Computations were performed in R using the *betapart* package<sup>64</sup>.

243 We used the species growth form to compute the proportion of woody species in each  
244 plant assemblage (WoodyProp) to assess potential changes in the assemblage-level patterns of  
245 woodiness and ecological generalism. To measure the assemblage-level ecological generalism,  
246 we initially classified as narrow-range plant species whose range size distribution was below the  
247 first quartile (~100 mil km<sup>2</sup>) of current projected distribution within Caatinga, or otherwise wide-  
248 range. Then, we extracted the proportion of wide-range species in each plant assemblage  
249 (WideProp). We calculated WoodyProp and WideProp for the current and future scenarios and  
250 used the ratio of future to current time to represent the relative change in woodiness  
251 (WoodyRatio =  $\text{WoodyProp}_{\text{future}} / \text{WoodyProp}_{\text{current}}$ ) and ecological generalism (WideRatio =

252 WideProp<sub>future</sub> / WideProp<sub>current</sub>) of plant assemblages. WoodyRatio and WideRatio above 1  
253 indicate a future increase in the assemblage-level proportions of woody and wide-range species,  
254 respectively. We used Kruskal-Wallis tests to assess whether the medians of (i) Current species  
255 richness, (ii)  $\Delta S$ , (iii) WoodyProp<sub>current</sub>, (iv) WoodyRatio, (v) WideProp<sub>current</sub>, and (vi) WideRatio  
256 differ between assemblages subject to biotic homogenisation ( $\Delta\beta_{\text{SOR}} < 0$ ) or heterogenisation  
257 ( $\Delta\beta_{\text{SOR}} > 0$ ). Linear relationships between changes in species richness ( $\Delta S$ ) and spatial beta-  
258 diversity ( $\Delta\beta_{\text{SOR}}$ ), and changes in the relative contribution of woody (WoodyRatio) and wide-  
259 range (WideRatio) species were verified through a modified t-test<sup>65</sup> to spatially correct the  
260 degrees of freedom of correlation coefficients. Computations were performed in R using the  
261 packages *SpatialPack*<sup>66</sup>.

262

## 263 REFERENCES

- 264 1. Scheffers, B. R. *et al.* The broad footprint of climate change from genes to biomes to  
265 people. *Science* **354**, aaf7671–aaf7671 (2016).
- 266 2. Román-Palacios, C. & Wiens, J. J. Recent responses to climate change reveal the drivers  
267 of species extinction and survival. *Proc. Natl. Acad. Sci. U. S. A.* **117**, 4211–4217 (2020).
- 268 3. Lenoir, J. & Svenning, J. C. Climate-related range shifts - a global multidimensional  
269 synthesis and new research directions. *Ecography* **38**, 15–28 (2015).
- 270 4. Olden, J. D., LeRoy Poff, N., Douglas, M. R., Douglas, M. E. & Fausch, K. D. Ecological  
271 and evolutionary consequences of biotic homogenization. *Trends Ecol. Evol.* **19**, 18–24  
272 (2004).
- 273 5. Urban, M. C. Accelerating extinction risk from climate change. *Science* **348**, 571–573  
274 (2015).

- 275 6. Socolar, J. B., Gilroy, J. J., Kunin, W. E. & Edwards, D. P. How Should Beta-Diversity  
276 Inform Biodiversity Conservation? *Trends Ecol. Evol.* **31**, 67–80 (2016).
- 277 7. Pecl, G. T. *et al.* Biodiversity redistribution under climate change: Impacts on ecosystems  
278 and human well-being. *Science* **355**, eaai9214 (2017).
- 279 8. Aguirre-Gutiérrez, J. *et al.* Long-term droughts may drive drier tropical forests towards  
280 increased functional, taxonomic and phylogenetic homogeneity. *Nat. Commun.* **11**, 1–10  
281 (2020).
- 282 9. Allen, K. *et al.* Will seasonally dry tropical forests be sensitive or resistant to future  
283 changes in rainfall regimes? *Environ. Res. Lett.* **12**, (2017).
- 284 10. Savage, J. & Vellend, M. Elevational shifts, biotic homogenization and time lags in  
285 vegetation change during 40 years of climate warming. *Ecography* **38**, 546–555 (2015).
- 286 11. Vellend, M. *et al.* Plant Biodiversity Change Across Scales During the Anthropocene.  
287 *Annu. Rev. Plant Biol.* **68**, 563–586 (2017).
- 288 12. Fauset, S. *et al.* Drought-induced shifts in the floristic and functional composition of  
289 tropical forests in Ghana. *Ecol. Lett.* **15**, 1120–1129 (2012).
- 290 13. Silva, J. M. C., Leal, I. R. & Tabarelli, M. *Caatinga. Caatinga: The Largest Tropical Dry*  
291 *Forest Region in South America* (Springer International Publishing, 2017).  
292 doi:10.1007/978-3-319-68339-3.
- 293 14. Banda-R, K. *et al.* Plant diversity patterns in neotropical dry forests and their conservation  
294 implications. *Science* **353**, 1383–1387 (2016).
- 295 15. Marengo, J. A., Torres, R. R. & Alves, L. M. Drought in Northeast Brazil—past, present,  
296 and future. *Theor. Appl. Climatol.* **129**, 1189–1200 (2017).
- 297 16. Silva, J. L. S., Cruz-Neto, O., Peres, C. A., Tabarelli, M. & Lopes, A. V. Climate change

- 298 will reduce suitable Caatinga dry forest habitat for endemic plants with disproportionate  
299 impacts on specialized reproductive strategies. *PLoS One* **14**, e0217028 (2019).
- 300 17. Pearson, R. G. *et al.* Life history and spatial traits predict extinction risk due to climate  
301 change. *Nat. Clim. Chang.* **4**, 217–221 (2014).
- 302 18. Slatyer, R. A., Hirst, M. & Sexton, J. P. Niche breadth predicts geographical range size: A  
303 general ecological pattern. *Ecol. Lett.* **16**, 1104–1114 (2013).
- 304 19. Pearcy, R. W. & Ehleringer, J. Comparative ecophysiology of C3 and C4 plants. *Plant,*  
305 *Cell Environ.* **7**, 1–13 (1984).
- 306 20. Smith, S. A. & Beaulieu, J. M. Life history influences rates of climatic niche evolution in  
307 flowering plants. *Proc. R. Soc. B Biol. Sci.* **276**, 4345–4352 (2009).
- 308 21. IPCC. *Climate Change 2021: The Physical Science Basis. Contribution of Working Group*  
309 *I to the Sixth Assessment Report of the Intergovernmental Panel on Climate Change.*  
310 (Cambridge University Press, 2021).
- 311 22. García-Palacios, P., Gross, N., Gaitán, J. & Maestre, F. T. Climate mediates the  
312 biodiversity–ecosystem stability relationship globally. *Proc. Natl. Acad. Sci.* **115**, 8400–  
313 8405 (2018).
- 314 23. Portillo-Quintero, C., Sanchez-Azofeifa, A., Calvo-Alvarado, J., Quesada, M. & do  
315 Espirito Santo, M. M. The role of tropical dry forests for biodiversity, carbon and water  
316 conservation in the neotropics: lessons learned and opportunities for its sustainable  
317 management. *Reg. Environ. Chang.* **15**, 1039–1049 (2015).
- 318 24. Prado-Junior, J. A. *et al.* Conservative species drive biomass productivity in tropical dry  
319 forests. *J. Ecol.* **104**, 817–827 (2016).
- 320 25. Gallagher, R. V. Correlates of range size variation in the Australian seed-plant flora. *J.*

- 321 *Biogeogr.* **43**, 1287–1298 (2016).
- 322 26. Fernandes, M. F., Cardoso, D. & de Queiroz, L. P. An updated plant checklist of the  
323 Brazilian Caatinga seasonally dry forests and woodlands reveals high species richness and  
324 endemism. *J. Arid Environ.* **174**, 104079 (2020).
- 325 27. Berdugo, M. *et al.* Global ecosystem thresholds driven by aridity. *Science* **367**, 787–790  
326 (2020).
- 327 28. Ulrich, W. *et al.* Climate and soil attributes determine plant species turnover in global  
328 drylands. *J. Biogeogr.* **41**, 2307–2319 (2014).
- 329 29. Yan, Y., Zhang, Q., Buyantuev, A., Liu, Q. & Niu, J. Plant functional  $\beta$  diversity is an  
330 important mediator of effects of aridity on soil multifunctionality. *Sci. Total Environ.* **726**,  
331 138529 (2020).
- 332 30. Jiang, L. *et al.* Characteristics and driving mechanisms of species beta diversity in desert  
333 plant communities. *PLoS One* **16**, e0245249 (2021).
- 334 31. Murphy, S. J., Salpeter, K. & Comita, L. S. Higher  $\beta$  diversity observed for herbs over  
335 woody plants is driven by stronger habitat filtering in a tropical understory. *Ecology* **97**,  
336 2074–2084 (2016).
- 337 32. Randin, C. F. *et al.* Climate change and plant distribution: local models predict high-  
338 elevation persistence. *Glob. Chang. Biol.* **15**, 1557–1569 (2009).
- 339 33. Chen, I.-C., Hill, J. K., Ohlemüller, R., Roy, D. B. & Thomas, C. D. Rapid Range Shifts  
340 of Species Associated with High Levels of Climate Warming. *Science* **333**, 1024–1026  
341 (2011).
- 342 34. Zu, K. *et al.* Upward shift and elevational range contractions of subtropical mountain  
343 plants in response to climate change. *Sci. Total Environ.* **783**, 146896 (2021).

- 344 35. Oliveira, F. M. P. *et al.* Effects of increasing aridity and chronic anthropogenic  
345 disturbance on seed dispersal by ants in Brazilian Caatinga. *J. Anim. Ecol.* **88**, 870–880  
346 (2019).
- 347 36. Oliveira, F. M. P. *et al.* Plant protection services mediated by extrafloral nectaries decline  
348 with aridity but are not influenced by chronic anthropogenic disturbance in Brazilian  
349 Caatinga. *J. Ecol.* **109**, 260–272 (2021).
- 350 37. Andrade, J. F., Alvarado, F., Carlos Santos, J. & Santos, B. A. Rainfall reduction increases  
351 insect herbivory in tropical herb communities. *J. Veg. Sci.* **31**, 487–496 (2020).
- 352 38. Antongiovanni, M., Venticinque, E. M., Matsumoto, M. & Fonseca, C. R. Chronic  
353 anthropogenic disturbance on Caatinga dry forest fragments. *J. Appl. Ecol.* **57**, 2064–2074  
354 (2020).
- 355 39. Frishkoff, L. O. *et al.* Climate change and habitat conversion favour the same species.  
356 *Ecol. Lett.* **19**, 1081–1090 (2016).
- 357 40. Oliveira, U. *et al.* Biodiversity conservation gaps in the Brazilian protected areas. *Sci.*  
358 *Rep.* **7**, 1–9 (2017).
- 359 41. Xu, H. *et al.* Ensuring effective implementation of the post-2020 global biodiversity  
360 targets. *Nat. Ecol. Evol.* **2021 54** **5**, 411–418 (2021).
- 361 42. GBIF. Global Biodiversity Information Facility – Free and Open Access to Biodiversity  
362 Data. (2021).
- 363 43. Kramer-Schadt, S. *et al.* The importance of correcting for sampling bias in MaxEnt  
364 species distribution models. *Divers. Distrib.* **19**, 1366–1379 (2013).
- 365 44. van Proosdij, A. S. J., Sosef, M. S. M., Wieringa, J. J. & Raes, N. Minimum required  
366 number of specimen records to develop accurate species distribution models. *Ecography*



- 367           **39**, 542–552 (2016).
- 368   45.   Enquist, B., Condit, R., Peet, R., Schildhauer, M. & Thiers, B. Cyberinfrastructure for an  
369           integrated botanical information network to investigate the ecological impacts of global  
370           climate change on plant biodiversity. (2016) doi:10.7287/peerj.preprints.2615.
- 371   46.   Kattge, J. *et al.* TRY - a global database of plant traits. *Glob. Chang. Biol.* **17**, 2905–2935  
372           (2011).
- 373   47.   Flora do Brasil. List of Species of Flora of Brazil. (2020).
- 374   48.   Zanne, A. E. *et al.* Three keys to the radiation of angiosperms into freezing environments.  
375           *Nature* **506**, 89–92 (2014).
- 376   49.   Moro, M. F., Lughadha, E. N., Filer, D. L., Araújo, F. S. De & Martins, F. R. *A catalogue*  
377           *of the vascular plants of the Caatinga Phytogeographical Domain: A synthesis of floristic*  
378           *and phytosociological surveys. Phytotaxa* vol. 160 (2014).
- 379   50.   Engemann, K. *et al.* A plant growth form dataset for the New World. *Ecology* **97**, 3243  
380           (2016).
- 381   51.   Fick, S. E. & Hijmans, R. J. WorldClim 2: new 1-km spatial resolution climate surfaces  
382           for global land areas. *Int. J. Climatol.* **37**, 4302–4315 (2017).
- 383   52.   Thuiller, W., Guéguen, M., Renaud, J., Karger, D. N. & Zimmermann, N. E. Uncertainty  
384           in ensembles of global biodiversity scenarios. *Nat. Commun.* **10**, 1–9 (2019).
- 385   53.   Barbet-Massin, M., Jiguet, F., Albert, C. H. & Thuiller, W. Selecting pseudo-absences for  
386           species distribution models: How, where and how many? *Methods Ecol. Evol.* **3**, 327–338  
387           (2012).
- 388   54.   Engler, R., Guisan, A. & Rechsteiner, L. An improved approach for predicting the  
389           distribution of rare and endangered species from occurrence and pseudo-absence data. *J.*

- 390 *Appl. Ecol.* **41**, 263–274 (2004).
- 391 55. Qiao, H., Soberón, J. & Peterson, A. T. No silver bullets in correlative ecological niche  
392 modelling: Insights from testing among many potential algorithms for niche estimation.  
393 *Methods Ecol. Evol.* **6**, 1126–1136 (2015).
- 394 56. Araújo, M. B. & New, M. Ensemble forecasting of species distributions. *Trends Ecol.*  
395 *Evol.* **22**, 42–47 (2007).
- 396 57. Barve, N. *et al.* The crucial role of the accessible area in ecological niche modeling and  
397 species distribution modeling. *Ecol. Modell.* **222**, 1810–1819 (2012).
- 398 58. Leroy, B. *et al.* Without quality presence-absence data, discrimination metrics such as  
399 TSS can be misleading measures of model performance. *J. Biogeogr.* **45**, 1994–2002  
400 (2018).
- 401 59. Mendes, P., Velazco, S. J. E., de Andrade, A. F. A. & De Marco, P. Dealing with  
402 overprediction in species distribution models: How adding distance constraints can  
403 improve model accuracy. *Ecol. Modell.* **431**, 109180 (2020).
- 404 60. R Core Team. R: A Language and Environment for Statistical Computing. v. 4.1.0 (2021).
- 405 61. Andrade, A. F. A. de, Velazco, S. J. E. & De Marco Júnior, P. ENMTML: An R package  
406 for a straightforward construction of complex ecological niche models. *Environ. Model.*  
407 *Softw.* **125**, (2020).
- 408 62. Baselga, A. Partitioning the turnover and nestedness components of beta diversity. *Glob.*  
409 *Ecol. Biogeogr.* **19**, 134–143 (2010).
- 410 63. Baselga, A., Gómez-Rodríguez, C. & Lobo, J. M. Historical legacies in world amphibian  
411 diversity revealed by the turnover and nestedness components of beta diversity. *PLoS One*  
412 **7**, e32341 (2012).

- 413 64. Baselga, A. & Orme, C. D. L. betapart: an R package for the study of beta diversity.  
414 *Methods Ecol. Evol.* **3**, 808–812 (2012).
- 415 65. Dutilleul, P. Modifying the t Test for Assessing the Correlation Between Two Spatial  
416 Processes. *Biometrics* **49**, 305–314 (1993).
- 417 66. Osorio, F., Vallejos, R., Cuevas, F. & Mancilla, D. SpatialPack: Package for analysis of  
418 spatial data. <http://spatialpack.mat.ufsm.cl> (2014).

419

## 420 **ACKNOWLEDGMENTS**

421 We are grateful to E. G. Moura-Jr for suggestions in previous versions of the manuscript. To  
422 Coordenação de Aperfeiçoamento de Pessoal de Nível Superior (CAPES) for fellowships made  
423 available to FAON. To Conselho Nacional de Desenvolvimento Científico e Tecnológico  
424 (CNPq) for research grants in support of BAS (#312178/2019-0) and DPS (#304494/2019–4). To  
425 Universidade Federal da Paraíba for research grants in support of BAS (PVA-13357-2020).

426

## 427 **AUTHOR CONTRIBUTIONS**

428 MRM, FAON, and BAS conceived the study; FAON compiled the data, MRM and FAON  
429 analysed the data. MRM developed the figures and led the writing. All authors contributed  
430 critically to the drafts and gave final approval for publication.

431

## 432 **COMPETING INTEREST STATEMENT**

433 Authors declare no competing interests.

434

435 **ADDITIONAL INFORMATION**

436 Supplementary Information is available for this paper, including Supplementary Tables (S1–S2)

437 and Supplementary Figures (S1–S7).

438 **FIGURE LEGENDS**

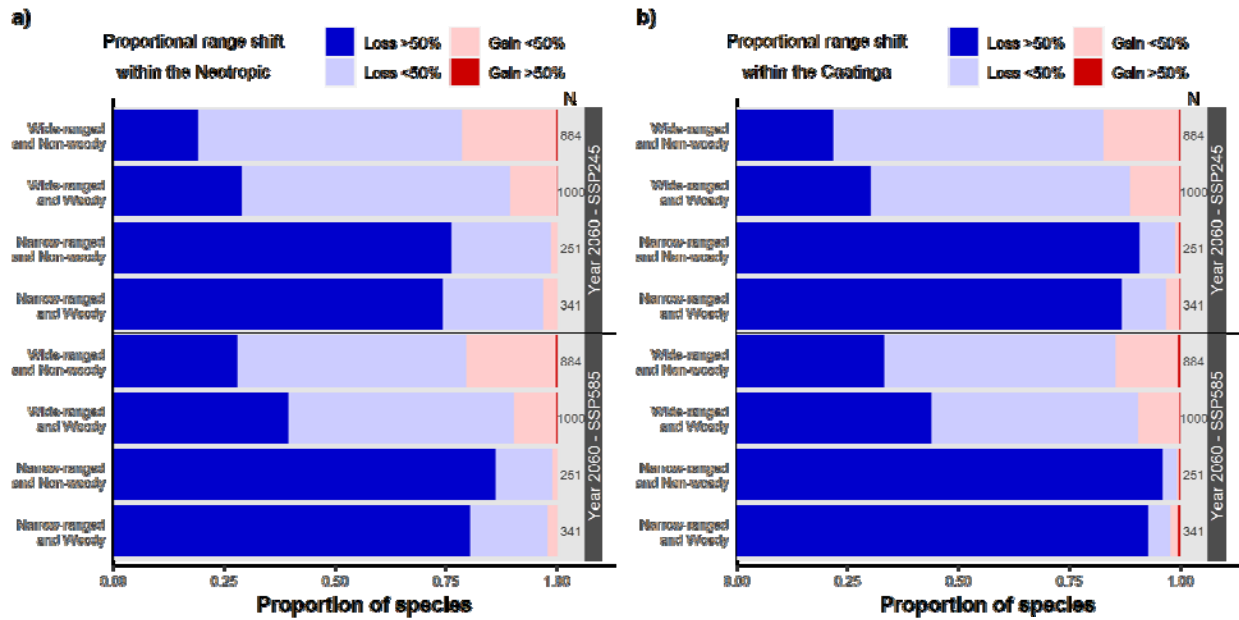

439

440 **Fig 1. Projected range shift for species holding different levels of woodiness and ecological**

441 **generalism.** Range shifts were computed separately within the (a) Neotropics and (b) Caatinga.

442 The results are shown for 2060 under the business-as-usual (SSP245) and non-mitigation

443 (SSP585) scenarios. See Fig. S3 for results concerning 2100.

444

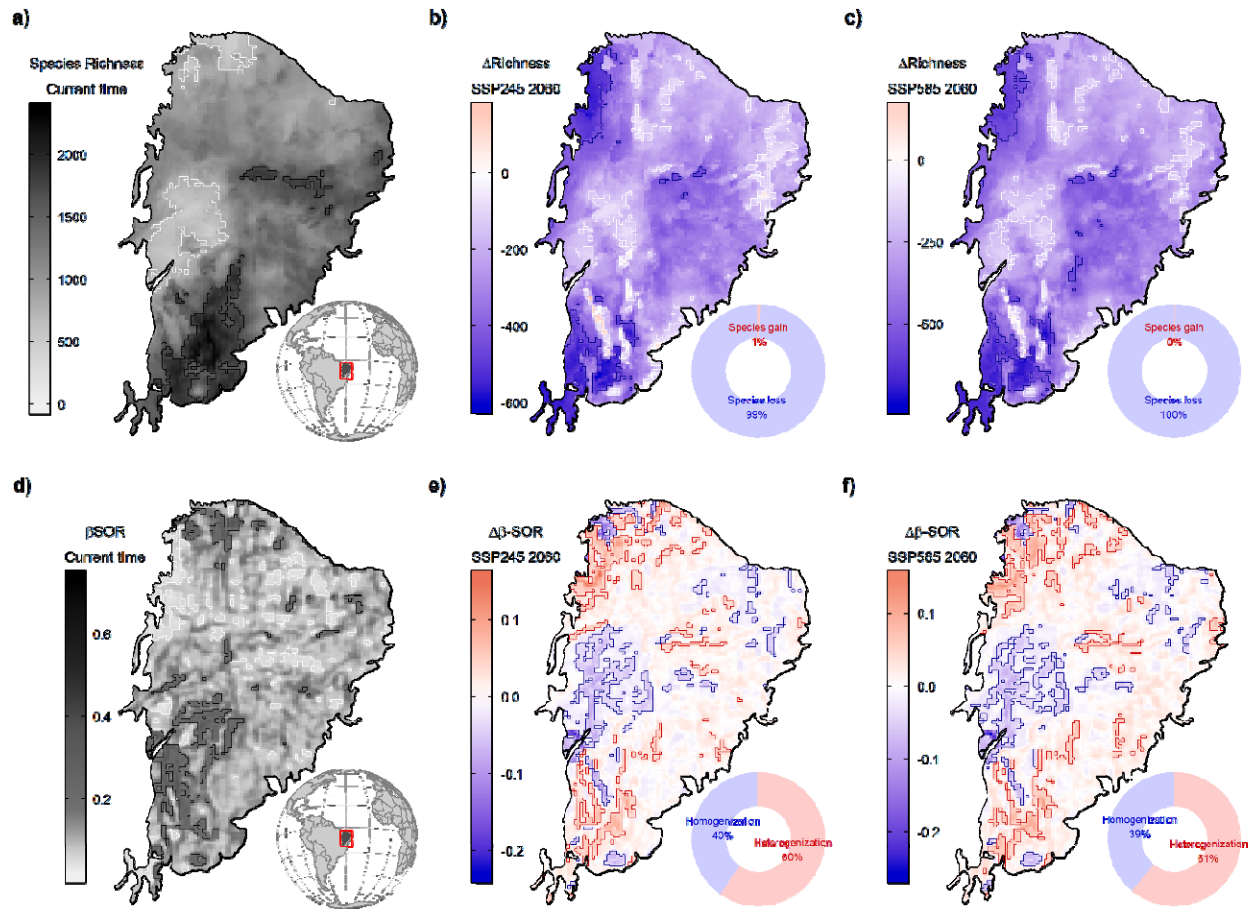

445

446 **Fig 2. Geographical patterns of plant species richness and spatial beta-diversity in the**  
447 **Caatinga.** (a) Projected species richness at the current time. Expected change in species richness  
448 ( $\Delta S$ ) across plant assemblages under the (b) business-as-usual (SSP245) and (c) non-mitigation  
449 (SSP585) scenarios in 2060. (d) Spatial beta-diversity ( $\beta_{SOR}$ ) for the current time. Expected  
450 change in spatial beta-diversity ( $\Delta\beta_{SOR}$ ) across plant assemblages under (e) SSP245 and (f)  
451 SSP585 scenarios for 2060. The contour lines denote the assemblages (cells) in the upper and  
452 lower 10% of the mapped pattern. See Fig. S4 for results concerning 2100.

453

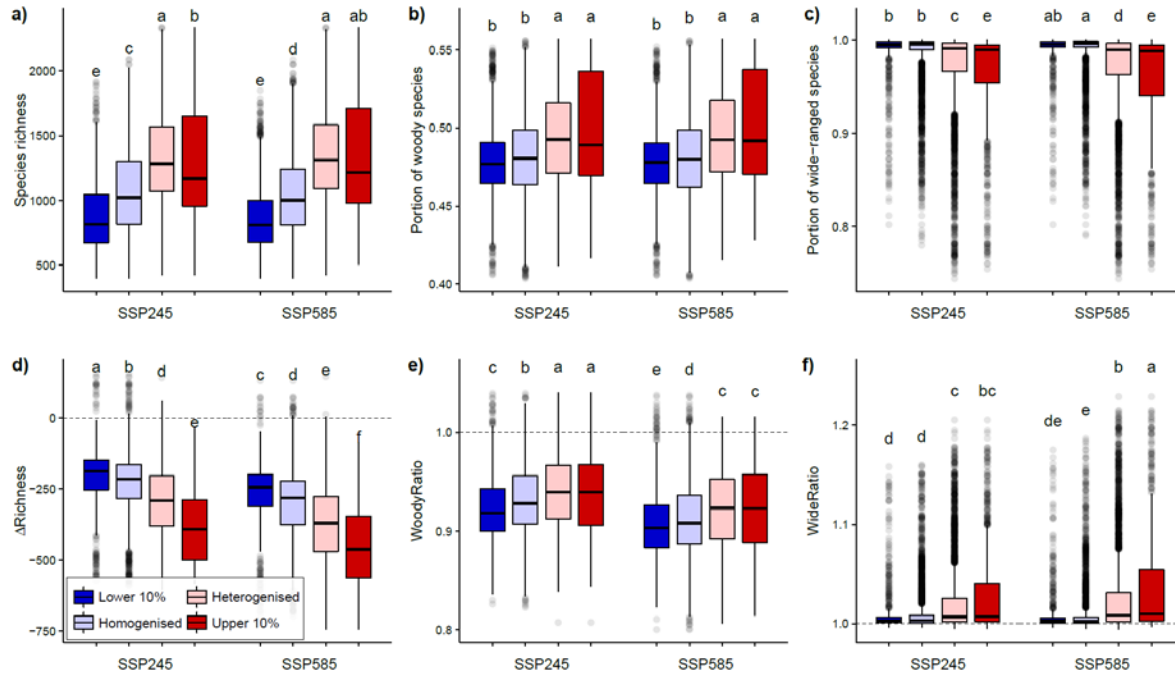

454

455 **Fig 3. Assemblage-level metrics across regions subject to different levels of projected biotic**

456 **change by 2060.** Each box denotes the median (horizontal line) and the 25th and 75th

457 percentiles. Vertical lines represent the 95% confidence intervals, and black dots are outliers.

458 Small capital letters denote the results of the Kruskal–Wallis tests for the difference in medians

459 across assemblages subject to different levels of biotic homogenisation ( $p = 0.05$ , using

460 Bonferroni correction). Woody and wide ratios above 1 indicate an increase in the assemblage-

461 level proportion of woody and wide-range species in the future. See Fig. S5 for results

462 concerning 2100.

463

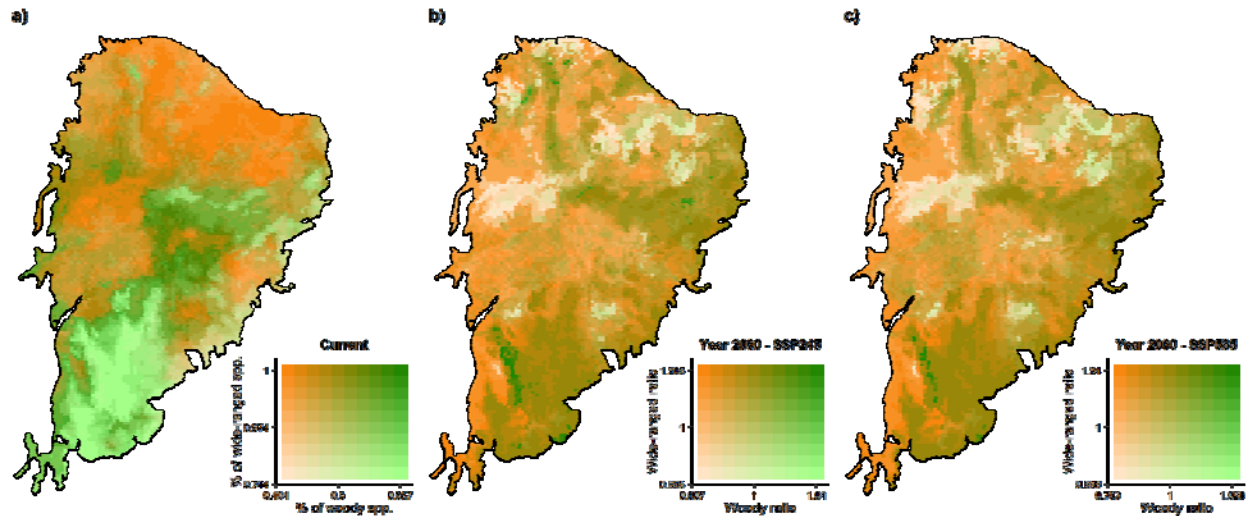

464

465 **Fig 4.** Patterns of woodiness and ecological generalism of plant assemblages in the Caatinga. (a)

466 Proportion of woody and wide-ranged species in plant assemblages. Relative change in the

467 proportion of woody and wide-range species between 2060 and the current time under the (b)

468 business-as-usual, SSP245 and (c) non-mitigation, SSP585 scenarios. Woody and Wide-range

469 ratios above 1 indicate an increase in the assemblage-level proportion of woody and wide-range

470 species in the future. See Fig. S6 for results concerning 2100.

471



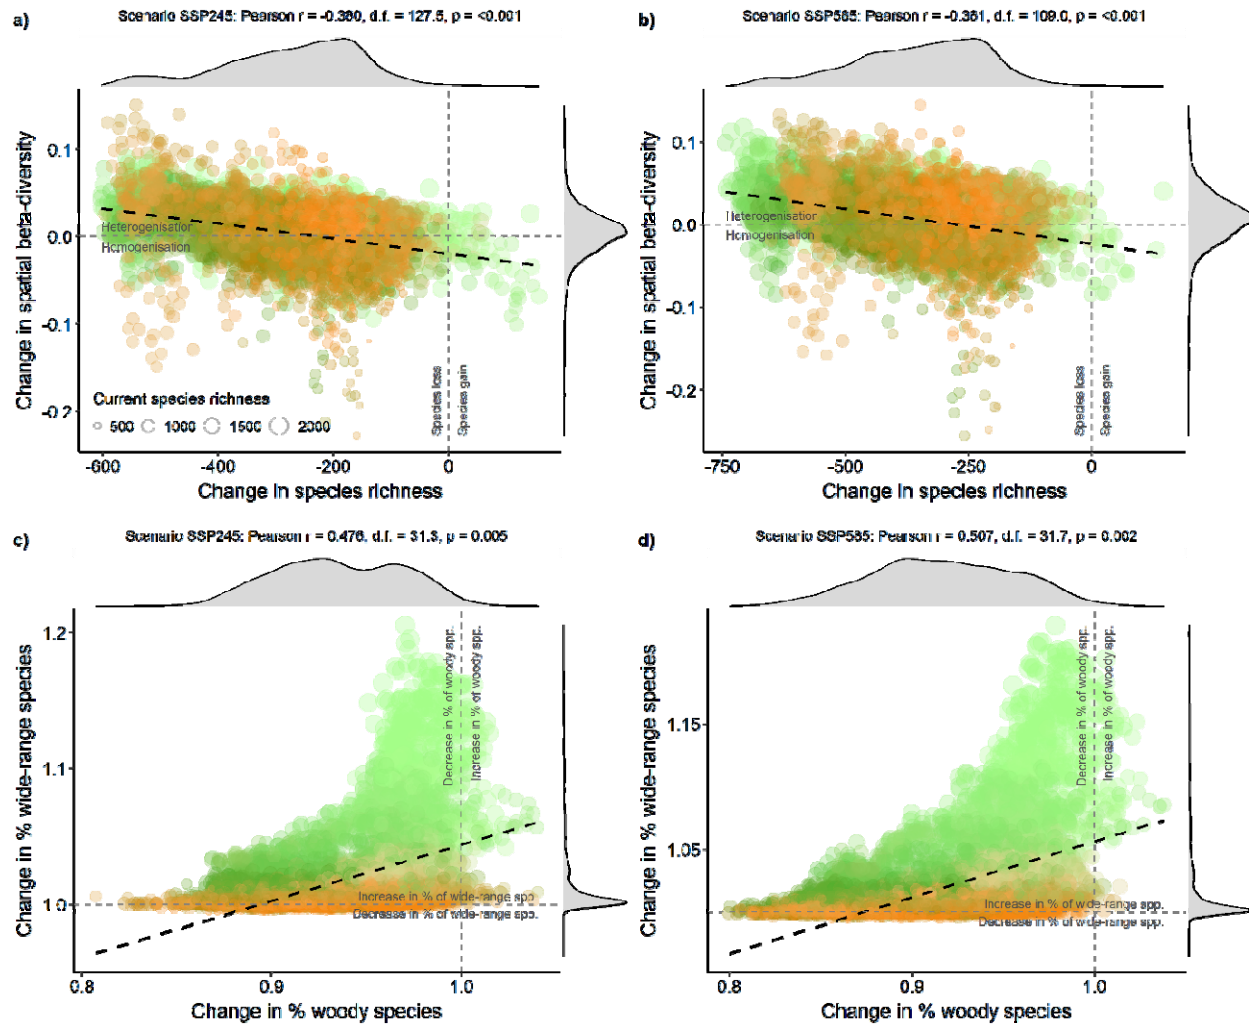

472

473 **Fig 5. Projected change in species richness, spatial beta-diversity, woodiness, and ecological**

474 **generalism in Caatinga plant assemblages by 2060.** Relationship between differences in

475 species richness ( $\Delta S$ ) and spatial beta-diversity ( $\Delta\beta_{SOR}$ ) in the scenarios (a) Business-as-usual,

476 SSP245, and (b) Non-mitigation SSP585. Relationship between change in relative contribution

477 of woody (WoodRatio) and wide-range (WideRatio) species. Symbol colours follow species

478 assemblage representation in Fig. 4a. Pearson correlations on the top of each panel were based

479 on spatially corrected degrees of freedom. See Fig. S7 for results concerning 2100.
